# Supplementary material for: Impact of vitamin D and vitamin D receptor on the trophoblast survival capacity in preeclampsia
Source: PLoS One. 2018 Nov 8;13(11):e0206725. doi: 10.1371/journal.pone.0206725 (PMC6226106; doi:10.1371/journal.pone.0206725)
Supplement: S1 File — (XLSX) [file pone.0206725.s001.xlsx]

## Sheet: Sheet1
AUTOPHAGY PROJECT MARTINA INDONESIA
GROUP	NO	AGE	BP	Proteinuria	PARITY	GEST AGE	BIRTH WEIGHT	BABY	CENTILE	Klinis Subjektif					Objective Clinic																		Ultrasonografi				Kardiotopografi			Penunjang Lain			25(OH)D		sFLT1/PGF	LGALS13
										Pusing	Pandangan Kabur	Kejang	Sesak	Nyeri Ulu Hati	BW	BH	Prepreg BW	BP sis	BP dias	JVP	Nadi	Napas	Jantung	Paru	Jml Urin	Wrn Urin	HTA	Usia Gestasi	TFU	Kontraksi	TBJ	VT	Tgl	GS	CRL	Pemeriksa	Tipe I	Tipe II	Tipe III	EKG	CT SCAN	Funduskopi	Maternal	Cord
Normal Pregnancy	1	36	110/70	UL -	1	39	3960	Boy	98						84.6	173	68.6	110	70																								34.6	44.2	9.1	397.143
	2	30	110/60	UL -	1	40	3070/47	Boy	25	X	X	X	X	X	69	154	47.8	110	60									40 mgg + 1	35 rbpx	1 x 10'	3072 gr	1 cm, portio tebal 2 cm, ket +, kepala blm masuk PAP, blm inp	2015-08-19										46.6	48.6	48.5	509.286
	3	29	110/70	UL -	1	40	3690/53	Boy	75	X	X	X	X	X	83	162	64	110	70		82	16										Blm Inp	2015-08-26				V						33.4	24.0	37.8	625
	4	37	140/80	UL -	3	38	3000/49	Girl	50	X	X	X	X	X	79	157	65	140	80		109	21					2014-12-08		32	3 X 30'		4 cm, PK I aktif, inp	2015-09-01				V						23.8	19.1	3.9	1115
	5	27	110/70	UL -	1	39	3040/47	Girl	40	X	X	X	X	X	82.3	165	60	110	70														2015-09-02										27.4	25.6	26.1	515.476
	6	25	110/70	UL -	2	40	3050/49	Boy	25	X	X	X	X	X	82	156	72	110	70														2015-08-27										38.5	37.5	28.7	246.667
	7	42	110/70	UL -	4	38	3430/51	Boy	75	X	X	X	X	X	74	157	65.2	110	70														2015-09-02										31.4	28.3	10.9	485.238
	8	27	110/70	UL -	1	40	2790/48	Boy	10	X	X	X	X	X	89	164	66	110	70		88	20					2014-12-13	37-38	3 jrbpx	(-)	2637	Blm inp	2015-08-28										61.4	47.4	4.7	699.762
	9	36	120/70	UL -	2	39	3280/51	Boy	50	X	X	X	X	X	65.9	159	54	120	70														2015-09-02										58.6	51.0	8.9	504.286
	10	34	100/60	UL -	3	38	3360/48	Girl	80						72.8	159	64.9	100	60																								39.1	32.5	6.4	4700.71
Preeclampsia LO	1	38	140/100	UL +1	3	40	4000/52	Boy	93	V	X	X	V	X	117	165	95	140	100		90	23				Kuning Pekat	2014-11-25	39	37	2 x 10'	3770	3 cm, portio tebal lunak 1/2 cm arah mendatar, ket +, menonjol, kep H I, poss SSL, inp	2015-08-25						V				28.9	25.8	(-)	(-)
	2	22	140/100	UL +3	2	39	3450/47	Girl	75	V	X	X	X	X	57	155	43	140	100		88	20							31	2 X 10'		3 cm, kepala 4/5, inp					V						34.1	21.4	(-)	(-)
	3	33	140/90	UL +2	3	36	2500/44	Boy	25	X	X	X	X	X	57	150	63	140	90		122	24					2014-12-19	36	30	(-)	2900	Blm inp	2015-08-26				V						38.9	28.2	11.9	0.952381
	4	25	140/90	UL +2	5	38	3750/51	Boy	93	V	X	X	X	X	57	155	50	140	90		125	20							35	2-3 x 10'		PKI laten	2015-09-01				V						30.5	22.9	89.5	1089.76
	5	36	190/140	UL +2	4	40	2750/48	Girl	10	X	X	X	X	X	61.5	151	54	190	140		96	18					12/2014					Portio tebal, ket -, blm inp	2015-09-02				V						32.2	21.1	50.9	419.048
	6	39	150/100	UL +2	3	37	2600/45	Girl	15	X	X	X	X	X	67	152	47	150	100		96	20							29	2 x 10'		2 cm, portio tebal lunak, inp	2015-09-02				V						26.0	23.0	153.0	1031.19
	7	24	170/100	UL +2	2	40	2800	Girl	1900-01-03	X	X	X	X	X	65	160	55	170	100		84	20					2014-11-24		34	1 x 10'		Blm inpartu	2015-09-02				V						25.0	27.1	(-)	(-)
	8	28	140/90	UL +2	1	37	3000/45	Girl	70	X	X	X	X	X				140	90		115	20							31			Blm inp	2015-09-09				V						22.4	8.1	83.8	385.238
	9	26	150/100	UL +3	1	38	2150/45	Boy	1900-01-02	X	X	X	X	X	80.4	154	64	150	100		80	20					2014-12-20		27	(+)	2325	Blm inpartu	2015-09-14				V						15.9	13.7	328.2	293.095
	10	32	169/100	UL +2	1	38	2400/45	Girl	1900-01-06	X	X	X	X	X	60	163	47	169	100		98	22	dbn	dbn					26	3x		lengkap, ket (-), H III, inpartu											18.1	11.6	74.0	584.524
	11	20	150/100	UL +4	1	40	3300/49	Girl	75	V	X	V	X	X	47	154	45	150	100		112	25				Kemerahan			32	4 x 10'		8 cm, H III, inp	2015-08-26										11.3	< 7.0	(-)	(-)
Preeclampsia EO	1	33	190/110	UL +2	3	34	2000/44	Girl	35	X	X	X	X	X	55	151	48	190	110		118	20							28	(-)		Blm inp	2015-09-06				V						41.4	28.5	(-)	(-)
	2	29	150/90	UL +3	1	28	900	Boy	10	X	X	X	X	X	82	164	70	150	90		80	18										Blm inp	2015-09-10										10.3	(-)	387.3	256.667
	3	40	150/110	UL +3	1	25	750	Boy	10	V	V	V	X	X	60	150	52	150	110		98	20						25		(-)	875	Portio licin, kenyal, posterior, ostium tertutup, blm inp	2015-09-14										16.3	(-)	<error>	353.333
	4	27	140/100	UL +2	1	35	1750/42	Girl	1900-01-08						70.8	156	54	140	100																								44.5	46.7	319.8	743.095
	5	38	140/90	UL +3	3	32	1535/40	Boy	12	X	X	X	X	X	54	159	46	140	90		92	18						32	25	(-)	1372	Blm inpartu	2015-09-14										23.8	(-)	226.5	328.095
	6	29	200/100	UL +3	1	34	750	Boy	3	X	X	X	V	X	118	153	95	200	100		120	28		Rhonki basah halus kedua lapang paru				33-34	31	(-)		Portio licin, kenyal, anterior, ostium tertutup, blm inp	2015-09-15										18.0	11.3	142.6	381.905
	7	35	140/90	UL +2	3	28	750/32	Girl	9	X	X	X	X	X	60	154	58	140	90				dbn	dbn									2015-09-14										35.3	(-)	222.1	393.095
	8	37	240/160	UL +2	2	30	1100/42	Boy	11	V	V	X	X	V	75	165	63	240	160		90	20	dbn	dbn				30	19cm	(-)	1290	tidak dilakukan	2015-09-26										15.4	16.5	2426.7	931.667
	9	25	170/100	UL +2	3	35	2500/45	Girl	70	65	155	60		22	65	155	60	170	100	gr. II-III	11.6			12.3		35.3	10160	218000	4.38 juta	81/28/35		74	2016-12-06	11.9/0.38	6.7	0.2	0.21	0.5	26	93	0.7	2072	14.7	14.6	55.8	120
IUGR Early Onset	1	19	110/70	UL -	1	31	1150/36	Boy	1900-01-08	X	X	X	X	X	46	150	40	110	70		80	20							26	(-)		Blm inp	2015-09-01						V				15.0	(-)	183.0	274.286
	2	27	120/80	UL -	2	35	1600/40	Boy	3	X	X	X	X	X	52	147	45	120	80		86	20					2014-10-31		29	(-)		Blm inp	2015-09-07				V						22.7	15.4	15.3	512.857
	3	32	100/70	UL -	2	34	1650/39	Boy	5	X	X	X	X	X	70	155	55	100	70		82	20	dbn	dbn			2015-01-10	26				blm inp	2015-09-12						V				18.8	15.4	6.6	249.524
	4	25	120/80	UL -	1	35	1800/45	Boy	5	X	X	X	X	X	67	153	50	120	80	5-2	84	20	dbn	dbn				35	28	(-)		tidak dilakukan, blm inp	2015-09-23										18.2	14.4	21.4	<error>
IUGR Late Onset	5	27	120/70	UL -	1	38	2460/46	Boy	5	X	X	X	X	X	61.5	158	49	120	70		84	20		Simetris				37 mgg + 5	35 rbpx	1 x 50'	2365 gr	0 cm (KPD)	2015-08-26				V						29.1	18.3	9.0	201.429
	6	30	110/80	UL-	2	39	2310/35	Boy	3	X	X	X	X	X	78	160	70	110	80		90	24					2014-12-07		26	(-)		Blm inp	2015-09-03				V						21.2	15.2	78.6	100.714
	7	37	140/90	UL -	4	37	2350/42	Girl	9	X	X	X	X	X	66	164	60	140	90		100	20							34			Blm inp	2015-09-21				V						29.7	26.3	41.0	383.095
	8	21	110/70	UL -	1	37	2015/45	Boy	3	X	X	X	X	X	56	155	45	110	70	5-2	83	20	dbn	dbn				37	24		1860	Portio lunak, pembukaan 3 cm, selaput ketuban (+)	2015-09-23										13.5	(-)	105.9	253.81
	9	32	110/70	UL -	1	37	2380/45	Boy	9	X	X	X	X	X	55.4	158	45	110	70		88	18	dbn	dbn		jernih	2014-12-14	37 mgg + 2	2japst	(-)	2350	blm inp	2015-10-19				V						19.1	14.4	4.3	46.1905
	10	28	110/70	UL -	1	36	1620	Girl	< 3	X	X	X	X	X	60	153	43	110	70		80	20	dbn	dbn		kuning jernih		36 mgg+2	1/2pst-fu	(-)	1680	Blm inp	2015-10-26				V						27.0	16.8	57.6	611.667
(-) : sample lysis or error
